# Supplementary material for: Systematic analysis of the interactions driving small molecule–RNA recognition
Source: Royal Society of Chemistry journal article supplement (doi:10.1039/d0md00167h), 2020-01-01
Supplement: d0md00167h1.pdf [file d0md00167h1.pdf]

# A systematic analysis of the interactions driving small molecule-RNA recognition

Padroni, G.<sup>a</sup>; Patwardhan N.<sup>a</sup>; Schapira M. <sup>b</sup>; Hargrove A.E. <sup>a\*</sup>

<sup>a</sup>Department of Chemistry, Duke University, Durham, North Carolina 27708, United States

<sup>b</sup>Department of Pharmacology and Toxicology, University of Toronto, Toronto, ON M5S 1A8, Canada.

## Supporting information

### Table of Contents

|                                      |           |
|--------------------------------------|-----------|
| <b>1. Methods .....</b>              | <b>2</b>  |
| <b>2. Structures .....</b>           | <b>4</b>  |
| <b>3. Interactions counts.....</b>   | <b>6</b>  |
| <b>4. Supplementary figures.....</b> | <b>12</b> |
| <b>5. References.....</b>            | <b>13</b> |

# 1. Methods

Structures containing small molecules in complex with RNA solved by x-ray crystallography were extracted from the PDB database on the 9/1/2018 (97 structures). Structures with B-factor higher than 2.7 Å and/or containing the same ligand were filtered out to result in 37 structures that were used for the analysis. If complexes contained the same ligand, structures with better resolution were retained for analysis. Intermolecular contacts between small molecules and RNA were initially identified by using a script that assigned atom types of atoms within 4 Å in ICM (Molsoft). Tight water molecules were included in the analysis and considered as part of the receptor. Inorganic ions and buffer components were excluded by this analysis. The interactions were sorted according to the following classification:

Table S1 Parameters used for sorting intermolecular interactions in this study.

| Type                           | Atom                                          | Distance (Å) | Angle                                            |
|--------------------------------|-----------------------------------------------|--------------|--------------------------------------------------|
| <b>Hydrophobic interaction</b> | C-C (aliphatic and/or aromatic), C-S and Cl-C | $\leq 4$     | -                                                |
| <b>Hydrogen bonding</b>        | N, O, S                                       | $\leq 3.9$   | $\geq 90^\circ$                                  |
| <b>Weak hydrogen bonding</b>   | CH-O                                          | $\leq 3.6$   | $\geq 130^\circ$                                 |
| <b>Stacking</b>                | C/N aromatic                                  | $\leq 4$     | Edge-to-face $60^\circ \leq \Phi \leq 120^\circ$ |
|                                |                                               |              | Face-to-face                                     |
|                                |                                               |              | $\Phi \leq 30^\circ, \Phi \geq 150^\circ$        |
|                                |                                               |              |                                                  |
|                                | Amide/guanidine                               | $\leq 4$     | Edge-to-face $60^\circ \leq \Phi \leq 120^\circ$ |
|                                |                                               |              | Face-to-face                                     |
|                                |                                               |              | $\Phi \leq 30^\circ, \Phi \geq 150^\circ$        |
|                                |                                               |              |                                                  |
| <b>Salt bridges</b>            | N(+) , O (-) phosphate                        | $\leq 4$     | -                                                |
| <b>Cation-<math>\pi</math></b> | N(+) aromatic C-N                             | $\leq 4$     | -                                                |

We also searched for halogen bonding, multipolar interactions, but none of these interactions were observed in our dataset. Coordination between inorganic ions and small molecule ligands

were manually determined for each structure by visually determined coordination of small molecules with  $K^+$  or  $Mg^{2+}$  ions. To account for structural differences between RNA and protein interaction between aromatic carbons within 4 Å from each other were also considered as hydrophobic interactions if not already classified as stacking interactions. Electrostatic charges were determined by ICM and/or extracted from the PDB database. The total number of interactions identified was 2213. Figures were generated using UCSF Chimera molecular visualization software.<sup>1</sup>

## 2. Structures

Table S2 List of small molecule-RNA complexes used in this study.

|    | PDB_ID | RNA                                           | Small molecules            | Resolution (Å) | Dataset |
|----|--------|-----------------------------------------------|----------------------------|----------------|---------|
| 1  | 1F27   | RNA Pseudoknot                                | Biotin                     | 1.3            | R       |
| 2  | 1LC4   | Eubacterial 16S rRNA A Site                   | Tobramycin                 | 2.54           | A       |
| 3  | 2BE0   | 16S rRNA A-Site                               | Paromomycin Derivative     | 2.63           | A       |
| 4  | 2BEE   | 16S rRNA A-Site                               | Paromomycin Derivative     | 2.6            | A       |
| 5  | 2F4U   | A-Site RNA                                    | Designer Antibiotic        | 2.6            | A       |
| 6  | 2FCX   | HIV-1-DIS Kissing Loop                        | Neamine                    | 2              | A       |
| 7  | 2FCY   | HIV-1 DIS kissing loop                        | Neomycin                   | 2.2            | A       |
| 8  | 2FCZ   | HIV-1 DIS kissing loop                        | Ribostamycin               | 2.01           | A       |
| 9  | 2FD0   | HIV-1 DIS kissing loop                        | Lividomycin A              | 1.8            | A       |
| 10 | 2G9C   | Purine Riboswitch                             | Modified Pyrimidines       | 1.7            | R       |
| 11 | 2GDI   | Thiamine pyrophosphate selective riboswitch   | Thiamine pyrophosphate     | 2.05           | R       |
| 12 | 2PWT   | Bacterial Ribosomal Decoding Site             | Aminoglycoside             | 1.8            | A       |
| 13 | 2XNW   | XPT-PBUX C74U RIBOSWITCH                      | Triazolo-triazole diamine  | 1.5            | R       |
| 14 | 2XNZ   | XPT-PBUX C74U RIBOSWITCH                      | Acetoguanamine             | 1.59           | R       |
| 15 | 2XO0   | XPT-PBUX C74U RIBOSWITCH                      | 2,4-Diamino-1,3,5-triazine | 1.7            | R       |
| 16 | 2XO1   | XPT-PBUX C74U RIBOSWITCH                      | N6-Methyladinine           | 1.6            | R       |
| 17 | 3C44   | HIV-1 DIS subtype F                           | Paromomycin                | 2              | A       |
| 18 | 3D2V   | Eukaryotic Thiamine pyrophosphate Riboswitch  | Pyrithiamine               | 2              | R       |
| 19 | 3D2X   | Eukaryotic Thiamine pyrophosphate Riboswitch  | oxythiamine pyrophosphate  | 2.5            | R       |
| 20 | 3G4M   | Guanine Riboswitch                            | 2-Aminopurine              | 2.4            | R       |
| 21 | 3GAO   | Guanine Riboswitch                            | Xanthine                   | 1.9            | R       |
| 22 | 3GER   | Guanine Riboswitch                            | 6-Chloroguanine            | 1.7            | R       |
| 23 | 3MIJ   | Telomeric RNA-G Quadruplex                    | Acridine based inhibitor   | 2.6            | R       |
| 24 | 3S4P   | Bacterial Ribosomal Decoding Site             | Paromomycin analogue       | 2.56           | A       |
| 25 | 3SKI   | 2-Deoxyguanosine riboswitch                   | 2-Deoxyguanosine           | 2.3            | R       |
| 26 | 3SKZ   | 2-Deoxyguanosine riboswitch                   | Guanosine                  | 2.61           | R       |
| 27 | 3SUH   | THF Riboswitch                                | 5-Formyl THF               | 2.65           | R       |
| 28 | 3WRU   | Bacterial Ribosomal Decoding Site             | Aminoglycoside             | 2.3            | A       |
| 29 | 4F8U   | Bacterial Ribosomal Decoding Site             | Sisomicin                  | 2              | A       |
| 30 | 4GPX   | Protozoal cytoplasmic ribosomal decoding site | 6-hydroxysisomicin         | 2.6            | A       |
| 31 | 4K31   | leishmanial rRNA A-site                       | Apramycin                  | 1.41           | A       |
| 32 | 4P20   | Bacterial Ribosomal Decoding Site             | Amikacin                   | 2.7            | A       |
| 33 | 4QLN   | ydao riboswitch                               | c-di-AMP                   | 2.65           | R       |
| 34 | 4YAZ   | 3',3'-cGAMP riboswitch                        | 3',3'-cGAMP                | 2              | R       |
| 35 | 4YB0   | 3',3'-cGAMP riboswitch                        | c-di-GMP                   | 2.12           | R       |
| 36 | 5NEF   | Guanidine Riboswitch P1 StemLoop              | Guanidine                  | 1.91           | R       |

|           |      |                                      |           |     |          |
|-----------|------|--------------------------------------|-----------|-----|----------|
| <b>37</b> | 5ZEI | Mutated bacterial rRNA decoding site | Geneticin | 2.1 | <b>A</b> |
|-----------|------|--------------------------------------|-----------|-----|----------|

### 3. Interactions counts

Table S3 Stacking interactions count (distance  $\leq 4\text{\AA}$ .  $\pi$  stacking angle  $60^\circ \leq \Phi \leq 120^\circ$ . Edge-to-face angle  $\Phi \leq 30^\circ$ ,  $\Phi \geq 150^\circ$ ).

| Interaction                      | RNA residue | # interactions | # interactions |
|----------------------------------|-------------|----------------|----------------|
| <b><math>\pi</math>-stacking</b> | A           | 482            | 764            |
|                                  | C           | 39             |                |
|                                  | G           | 163            |                |
|                                  | U           | 80             |                |
| <b>Edge-to-face</b>              | A           | 1              | 3              |
|                                  | C           | -              |                |
|                                  | G           | 2              |                |
|                                  | U           | -              |                |
| <b>Guanidine/Amide stacking</b>  | A           | 2              | 3              |
|                                  | C           | -              |                |
|                                  | G           | 1              |                |
|                                  | U           | -              |                |
| Total 770                        |             |                |                |

Table S4 Strong hydrogen bonding interaction count (distance between heavy atoms  $\leq 3.9\text{\AA}$ . angle  $\Phi \geq 90^\circ$ ).

| Interaction | Ligand atom | RNA Atom | RNA residue | # interactions | # interactions |
|-------------|-------------|----------|-------------|----------------|----------------|
| <b>2'OH</b> | O and N     | OH sugar | A           | 5              | 21             |
|             |             |          | C           | 3              |                |
|             |             |          | G           | 9              |                |

|                        |           |                   |   |    |     |
|------------------------|-----------|-------------------|---|----|-----|
|                        |           |                   | U | 4  |     |
| <b>O-Phosphate</b>     | OH and NH | O-<br>(phosphate) | A | 47 | 93  |
|                        |           |                   | C | 12 |     |
|                        |           |                   | G | 26 |     |
|                        |           |                   | U | 8  |     |
| <b>O-sugar</b>         | OH and NH | O-sugar<br>O5'    | A | 12 | 21  |
|                        |           |                   | C | 1  |     |
|                        |           |                   | G | 7  |     |
|                        |           |                   | U | 1  |     |
| <b>Imino</b>           | O and N   | NH                | A | /  | 54  |
|                        |           |                   | C | /  |     |
|                        |           |                   | G | 11 |     |
|                        |           |                   | U | 43 |     |
| <b>Carbonyl Base</b>   | NH and OH | O                 | A | /  | 106 |
|                        |           |                   | C | 18 |     |
|                        |           |                   | G | 26 |     |
|                        |           |                   | U | 62 |     |
| <b>N aromatic</b>      | NH and OH | N7/N1/N3          | A | 17 | 87  |
|                        |           |                   | C | 15 |     |
|                        |           |                   | G | 55 |     |
|                        |           |                   | U | /  |     |
| <b>Exocyclic amine</b> | O or N    | NH2               | A | 44 | 139 |
|                        |           |                   | C | 67 |     |

|              |   |   |   |    |     |
|--------------|---|---|---|----|-----|
|              |   |   | G | 28 |     |
|              |   |   | U | /  |     |
| <b>N-wat</b> | O | N | - | -  | 104 |
| <b>O-wat</b> | O | O | - | -  | 136 |
| <b>S-wat</b> | O | S |   |    | 1   |
| Total 762    |   |   |   |    |     |

Table S5 Hydrophobic interactions count.

| Interaction                | Ligand atom | RNA Atom | RNA<br>residue | #<br>interactions | #<br>interactions |
|----------------------------|-------------|----------|----------------|-------------------|-------------------|
| <b>Aromatic- aliphatic</b> | C aromatic  | C sugar  | A              | 11                | 36                |
|                            |             |          | C              | 4                 |                   |
|                            |             |          | G              | 14                |                   |
|                            |             |          | U              | 7                 |                   |
| <b>sp2C-Aromatic</b>       | Sp2 C       | C base   | A              | 38                | 180               |
|                            |             |          | C              | 15                |                   |
|                            |             |          | G              | 83                |                   |
|                            |             |          | U              | 44                |                   |
| <b>Aliphatic-Aliphatic</b> | C aliphatic | C sugar  | A/m6A          | 3                 | 14                |
|                            |             |          | C              | 1                 |                   |
|                            |             |          | G              | 5                 |                   |
|                            |             |          | U              | 5                 |                   |
| <b>Aliphatic-Aromatic</b>  | C aliphatic | C base   | A              | 16                | 151               |
|                            |             |          | C              | 6                 |                   |



|                           |                    |   |     |    |
|---------------------------|--------------------|---|-----|----|
|                           |                    | G | 128 |    |
|                           |                    | U | 1   |    |
| Sulphur-sp2/sp3<br>carbon | C sugar, C<br>base | A | 6   | 12 |
|                           |                    | C | -   |    |
|                           |                    | G | 6   |    |
|                           |                    | U | -   |    |
| Halogen-carbon            |                    | A | 1   | 1  |
|                           |                    | C | -   |    |
|                           |                    | G | -   |    |
|                           |                    | U | -   |    |

Total 395

Table S6 Weak hydrogen bonding (CH-O) interaction count (distance between heavy atoms  $\leq 3.6\text{\AA}$ , angle  $\Phi \geq 130^\circ$ )

| Interaction      | Ligand atom | RNA Atom  | RNA<br>residue | #<br>interactions | #<br>interactions |
|------------------|-------------|-----------|----------------|-------------------|-------------------|
| <b>Aliphatic</b> | O           | C-H sugar | A              | 3                 | 7                 |
|                  |             |           | C              | -                 |                   |
|                  |             |           | G              | 4                 |                   |
|                  |             |           | U              | -                 |                   |
| <b>Aromatic</b>  | O           | C-H base  | A              | 4                 | 14                |
|                  |             |           | C              | 3                 |                   |
|                  |             |           | G              | 2                 |                   |
|                  |             |           | U              | 5                 |                   |
| <b>Aliphatic</b> | C-H         |           | A              | 13                | 61                |
|                  |             |           | C              | 4                 |                   |

|                 |    |                                   |   |    |    |
|-----------------|----|-----------------------------------|---|----|----|
|                 |    | O sugar<br>phosphate,<br>carbonyl | G | 34 |    |
|                 |    |                                   | U | 10 |    |
| <b>Aromatic</b> | CH | O sugar<br>phosphate,<br>carbonyl | A | 4  | 6  |
|                 |    |                                   | C | -  |    |
|                 |    |                                   | G | 2  |    |
|                 |    |                                   | U | -  |    |
| <b>Water</b>    | CH | O water                           |   |    | 46 |

Total 134

Table S7 Distribution of cation- $\pi$  interactions.

| Interaction                    | Ligand atom | RNA residue | # interactions | # interactions |
|--------------------------------|-------------|-------------|----------------|----------------|
| <b>Cation-<math>\pi</math></b> | N           | A           | 6              | 66             |
|                                |             | C           | 6              |                |
|                                |             | G           | 39             |                |
|                                |             | U           | 15             |                |

Total 66

Table S8 Distribution of salt-bridge interactions.

| Interaction        | Ligand atom               | RNA residue | # interactions |
|--------------------|---------------------------|-------------|----------------|
| <b>Salt Bridge</b> | N (positively<br>charged) | O phosphate | 63             |

Table S9 Distribution of interactions with inorganic ions.

| Interaction | Ligand atom | Ion | # interactions | # interactions |
|-------------|-------------|-----|----------------|----------------|
|-------------|-------------|-----|----------------|----------------|

|                  |               |                              |    |    |
|------------------|---------------|------------------------------|----|----|
| <b>Inorganic</b> | O (negatively | K <sup>+</sup>               | 8  | 23 |
|                  | charged)      | Mg <sub>2</sub> <sup>+</sup> | 15 |    |

## 4. Supplementary figures

**A**

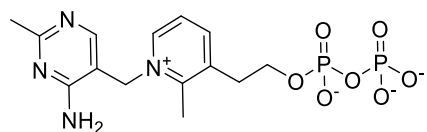

**S1**

**B**

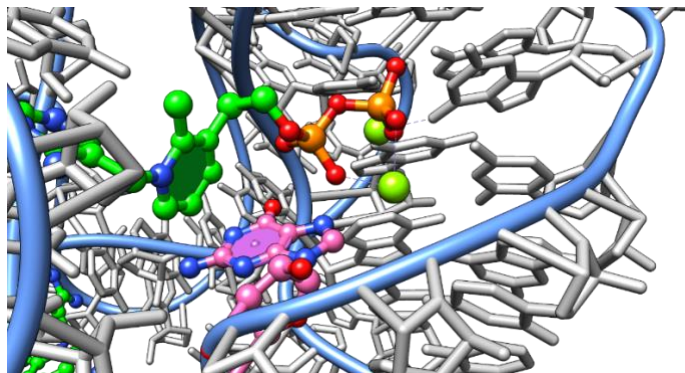

*Figure S1 Depiction of the T-shaped (edge to face) interactions observed between the pyridine ring of the antibacterial compound thiamine pyrophosphate with a G residue of the thiamine riboswitch (PDB ID 3D2V).*

**A**

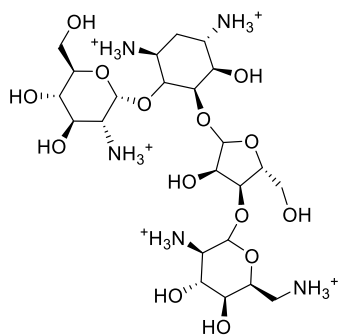

**S2**

**B**

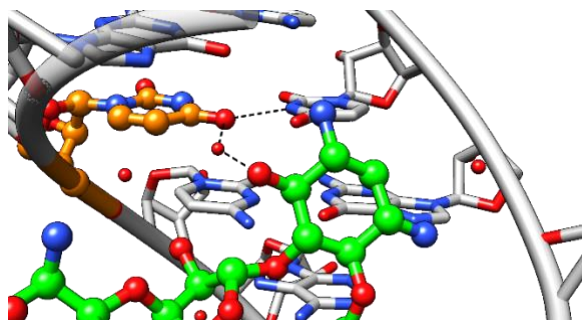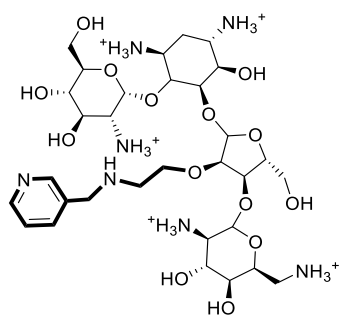

**S3**

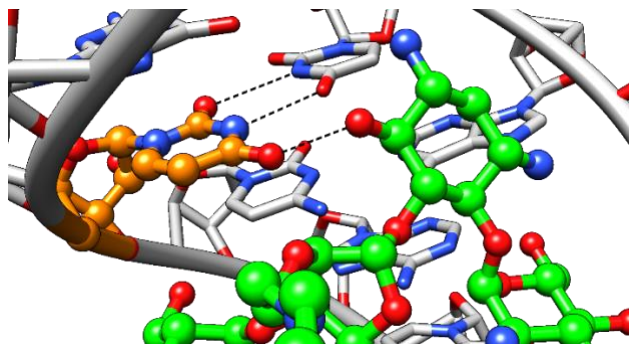

*Figure S2 Structures and depiction of hydrogen bonding pattern after directionality optimization of paramomycin (**S2**, PDBID 1J7T) and its analogue (**S3**, PDB ID 2BE0, chemical derivatization is bolded).*

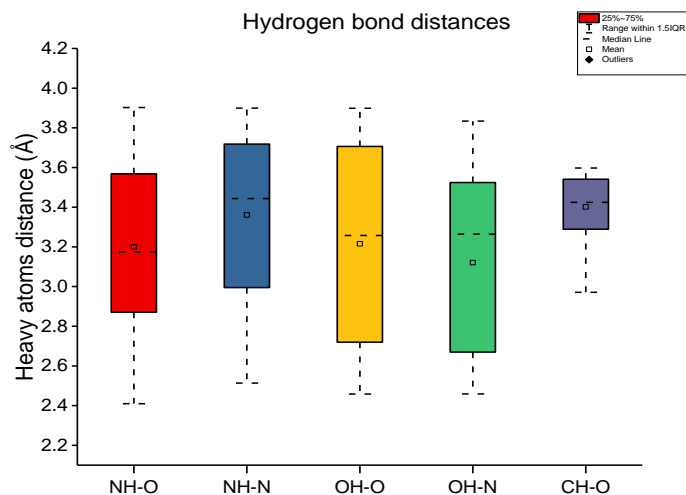

Figure S3 Whisker plots of the distribution of weak and strong hydrogen bonds distance between heavy atoms of small molecule-RNA recognition.

## 5. References

- (1) Pettersen, E. F.; Goddard, T. D.; Huang, C. C.; Couch, G. S.; Greenblatt, D. M.; Meng, E. C.; Ferrin, T. E. UCSF Chimera—A Visualization System for Exploratory Research and Analysis. *J. Comput. Chem.* **2004**, 25 (13), 1605–1612. <https://doi.org/10.1002/jcc.20084>.
