# Supplementary material for: Systematic analysis of the interactions driving small molecule–RNA recognition
Source: Royal Society of Chemistry journal article supplement (doi:10.1039/d0md00167h), 2020-01-01
Supplement: d0md00167h2.xlsx [file d0md00167h2.xlsx]

## Sheet: data
mol
